# Supplementary material
Source: publisher figshare collection journal article supplement (https://acs.figshare.com/ndownloader/files/24621642)
Supplement: Supplementary file 1 [file 24621642]

Supporting information

# Dynamic changes in charge transfer resistances during cycling of aprotic Li-O<sub>2</sub> batteries

*Kota Morimoto<sup>1</sup>, Takayoshi Kusumoto<sup>1</sup>, Kiho Nishioka<sup>1</sup>, Kazuhide Kamiya<sup>1,2</sup>,*

*Yoshiharu Mukouyama<sup>2,3,\*</sup>, Shuji Nakanishi<sup>1,2,\*</sup>*

<sup>1</sup> Graduate School of Engineering Science, Osaka University, 1-3

Machikaneyama, Toyonaka, Osaka 560-8531, Japan

<sup>2</sup> Research Center for Solar Energy Chemistry, Osaka University, 1-3

Machikaneyama, Toyonaka, Osaka 560-8531, Japan

<sup>3</sup> Division of Science, College of Science and Engineering, Tokyo Denki

University, Hatoyama, Saitama 350-0394, Japan

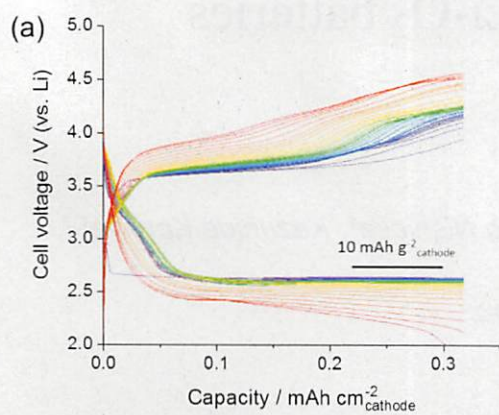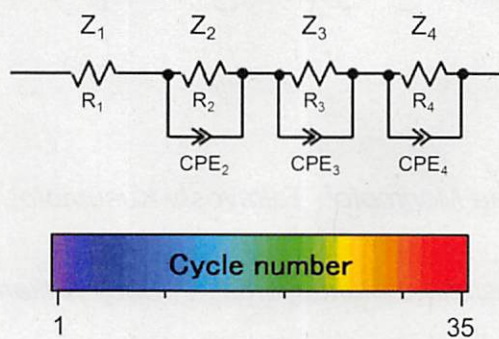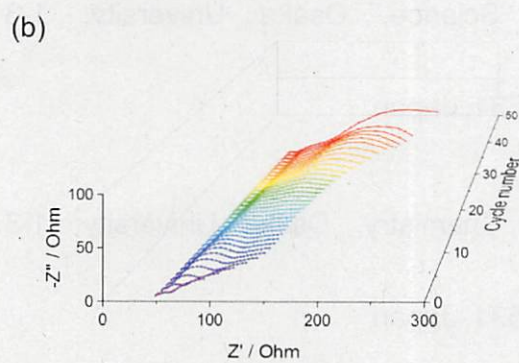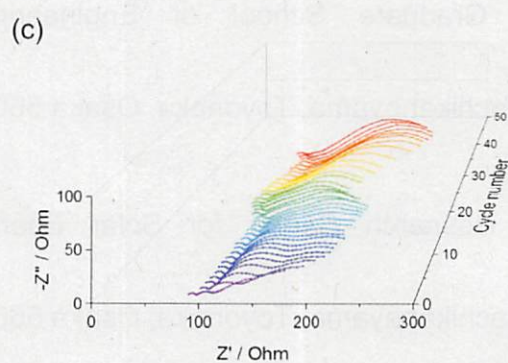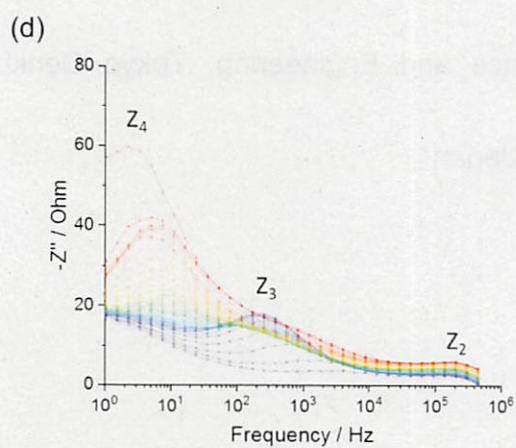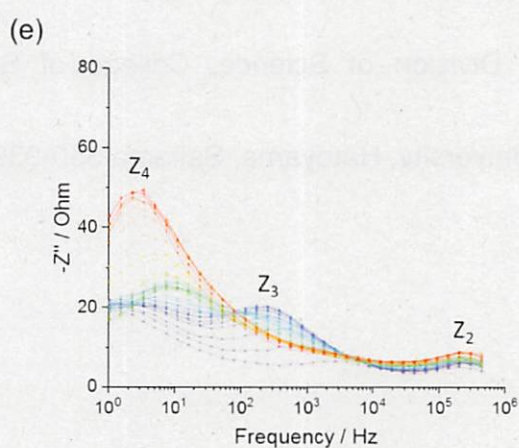



**Figure S1.** (a) (left) Cycle profiles of Li-O<sub>2</sub> cells with CC charging mode, and (right) equivalent circuit used for analyzing the EIS data. (b, c) Cole-Cole plots and (d, e) Bode plots of the EIS data collected after (b, d) discharging and (c, e) charging processes.

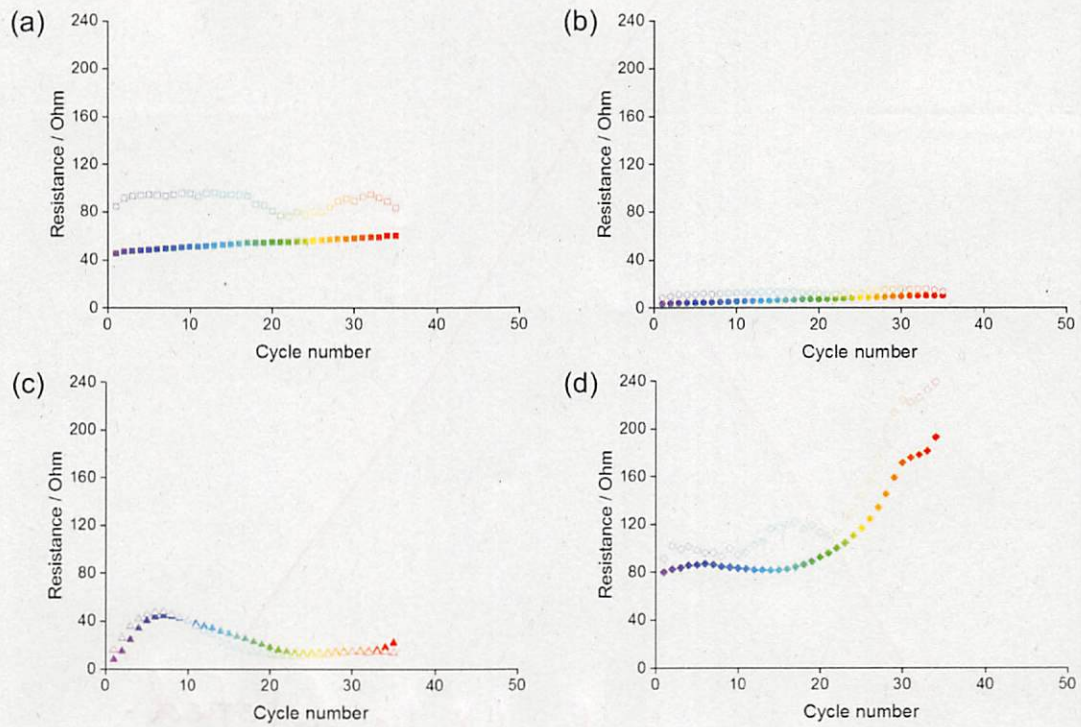

**Figure S2.** Resistances vs. cycle number plots obtained for the cycle test with the CC charging mode shown in Figure 3: (a)  $R_1$ , (b)  $R_2$ , (c)  $R_3$ , (d)  $R_4$ . The filled and open symbols correspond to the data obtained after the discharging and charging process, respectively.



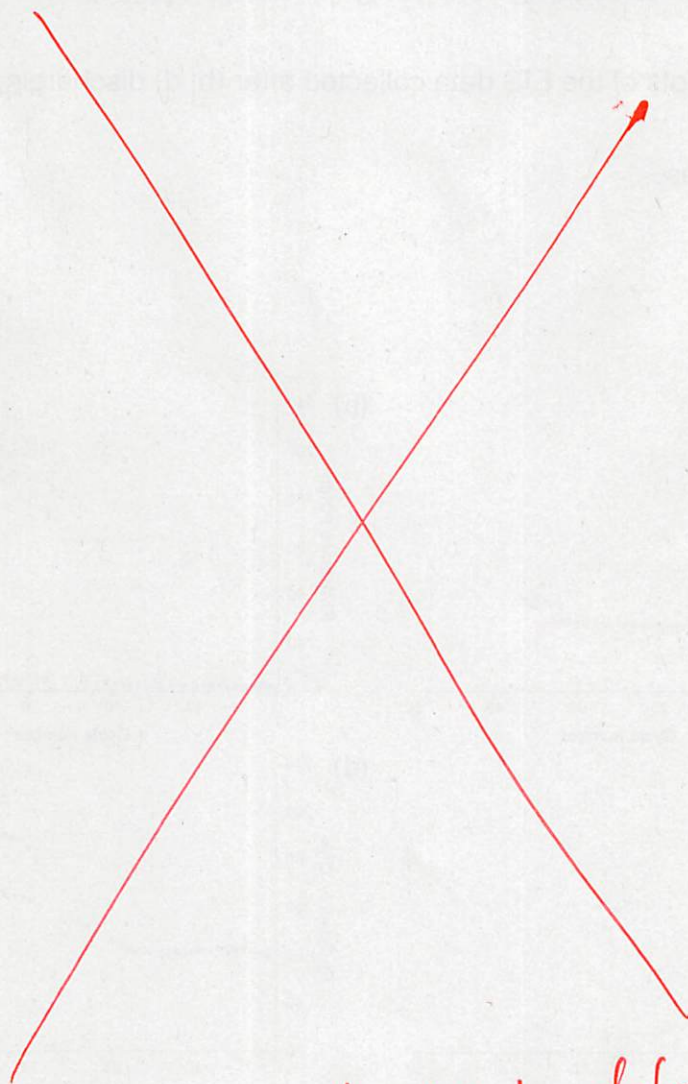

This page should be deleted.

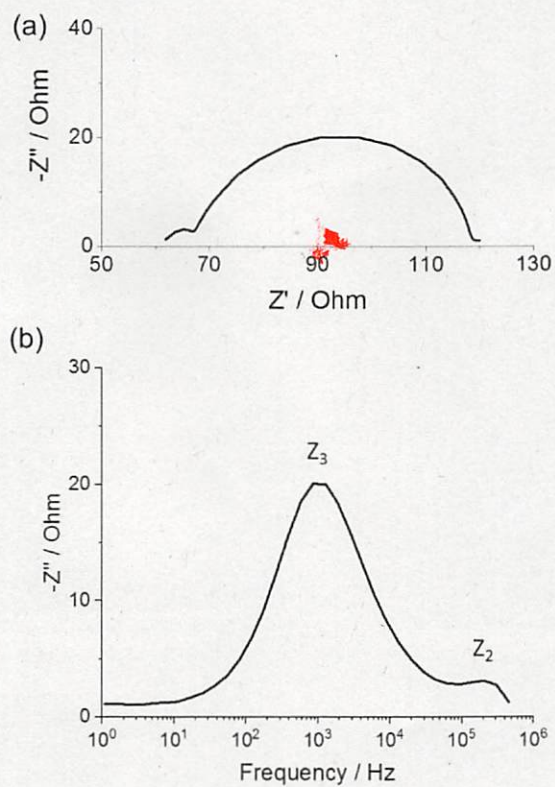

**Figure S3.** (a) Cole-Cole plot and (b) Bode plot of the potentiostatic EIS measurements at OCV using Li/Li symmetry cell.



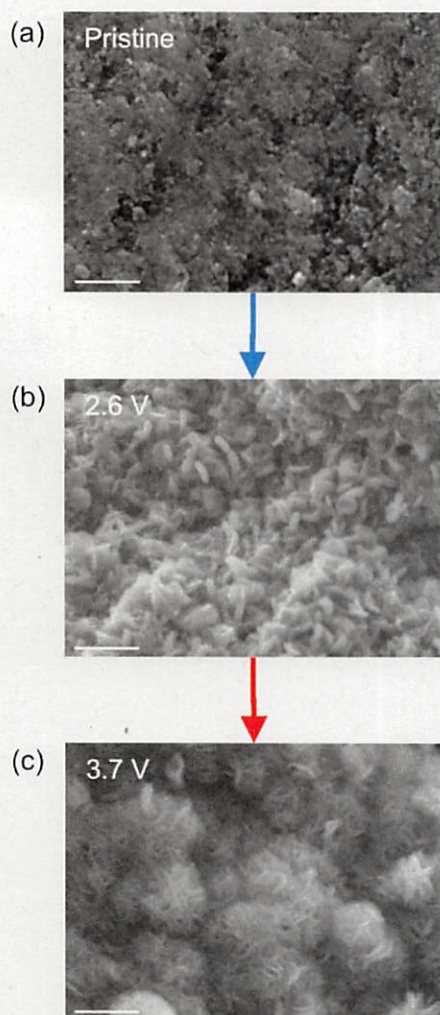

**Figure S4.** SEM images of (a) the pristine cathode surfaces and the cathode surfaces (b) after discharging process at 2.6 V ( $4.0 \text{ mAh/cm}^2$ ) and (c) after the charging process at 3.7 V ( $3.2 \text{ mAh/cm}^2$ ). The scale bar is  $1 \text{ }\mu\text{m}$ .

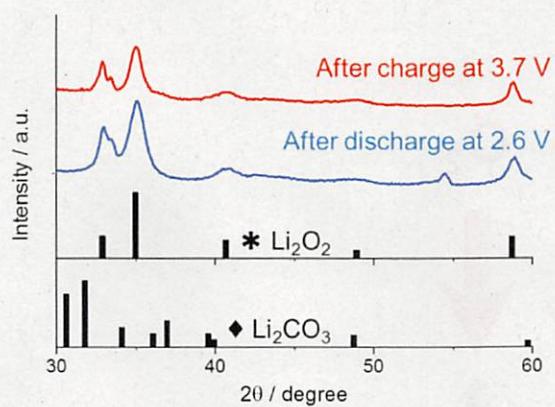

**Figure S5.** XRD patterns of the cathode surfaces (blue) after discharging process at 2.6 V (4.0 mAh/cm<sup>2</sup>) and (red) after the charging process at 3.7 V (3.2 mAh/cm<sup>2</sup>).



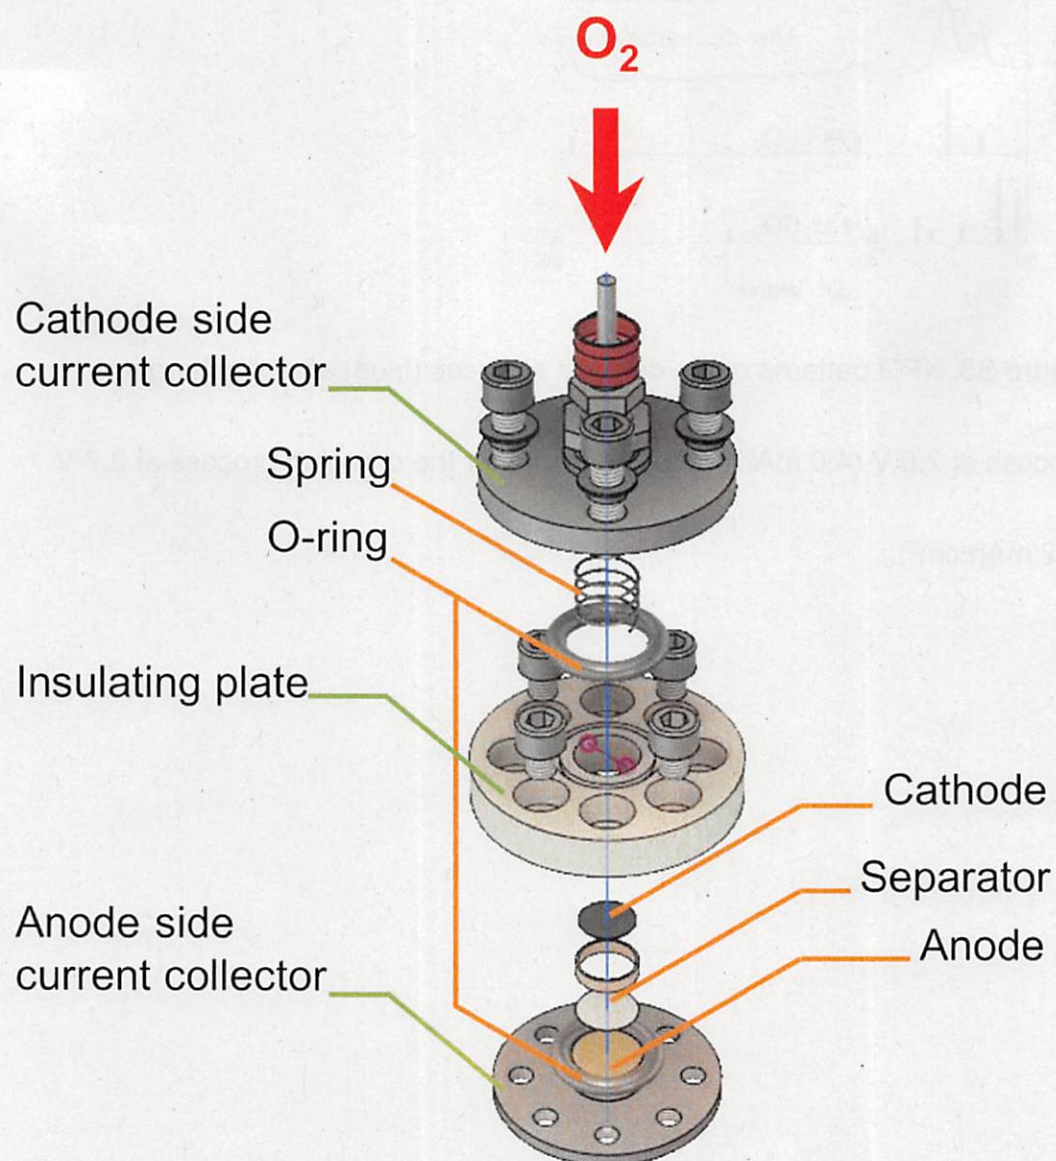

**Figure S6.** The schematic image of an electrochemical cell for Li-O<sub>2</sub> battery used in this study.
